# Supplementary material for: In situ measurements of perturbations to stratospheric aerosol and modeled ozone and radiative impacts following the 2021 La Soufrière eruption
Source: Copernicus journal article supplement (doi:10.5194/egusphere-2023-1891), 2023-08-25
Supplement: Supplementary file 1 [file egusphere-2023-1891-supplement.pdf]

*Supplement of*  
***In situ* measurements of perturbations to stratospheric aerosol  
and modeled ozone and radiative impacts following the 2021 La  
Soufrière eruption**

Yaowei Li<sup>1,#</sup>, Corey Pedersen<sup>1,#</sup>, John Dykema<sup>1</sup>, Jean-Paul Vernier<sup>2,3</sup>, Sandro Vattioni<sup>4</sup>, Amit Kumar Pandit<sup>3</sup>, Andrea Stenke<sup>4,5,6</sup>, Elizabeth Asher<sup>7,a</sup>, Troy Thornberry<sup>8</sup>, Michael A. Todt<sup>7,b</sup>, ThaoPaul Bui<sup>9</sup>, Jonathan Dean-Day<sup>10</sup>, Frank N. Keutsch<sup>1,11,12</sup>

<sup>1</sup>School of Engineering and Applied Sciences, Harvard University, Cambridge, Massachusetts 02138, United States

<sup>2</sup>NASA Langley Research Center, Hampton, Virginia 23666, United States

<sup>3</sup>National Institute of Aerospace, Hampton, Virginia 23666, United States

<sup>4</sup>Institute of Atmospheric and Climate Science, ETH Zürich, 8092 Zurich, Switzerland

<sup>5</sup>Institute of Biogeochemistry and Pollutant Dynamics, ETH Zurich, 8092 Zurich, Switzerland

<sup>6</sup>Eawag, Swiss Federal Institute of Aquatic Science and Technology, 8600 Dübendorf, Switzerland

<sup>7</sup>Cooperative Institute for Research in Environmental Sciences (CIRES), University of Colorado, Boulder, Colorado 80309, United States

<sup>8</sup>Chemical Sciences Laboratory, National Oceanic and Atmospheric Administration (NOAA), Boulder, Colorado 80309, United States

<sup>9</sup>NASA Ames Research Center, Moffett Field, California 94043, United States

<sup>10</sup>Bay Area Environmental Research Institute, Petaluma, California 94035, United States

<sup>11</sup>Department of Chemistry and Chemical Biology, Harvard University, Cambridge, Massachusetts 02138, United States

<sup>12</sup>Department of Earth and Planetary Sciences, Harvard University, Cambridge, Massachusetts 02138, United States

a Now at Global Monitoring Laboratory, National Oceanic and Atmospheric Administration (NOAA), Boulder, Colorado 80309, United States

b Now at Finnish Meteorological Institute (FMI), 00560 Helsinki, Finland

#These authors contributed equally to this work

*Correspondence to:* Yaowei Li (yaoweili@seas.harvard.edu), Frank N. Keutsch (keutsch@seas.harvard.edu)

**Contents of this file**

Figures S1 to S10

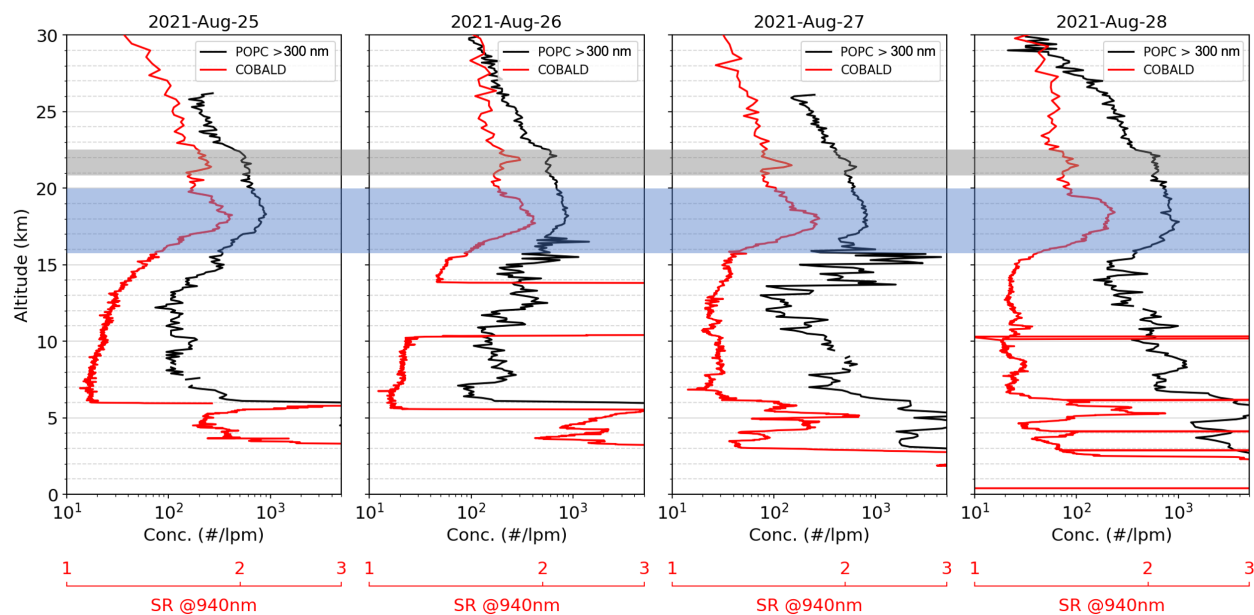

Figure S1. Aerosol vertical profiles from nighttime DCOTSS balloon-borne observations using POPC and COBALD instruments over Salina, Kansas in August 2021. Scattering ratios (SR) at 940 nm were calculated from COBALD backscatter measurements. The blue shaded area shows aerosol enhancements from the lower volcanic plume, while the grey shaded area shows the influence of the transient filament excursion of the tropical upper plume.

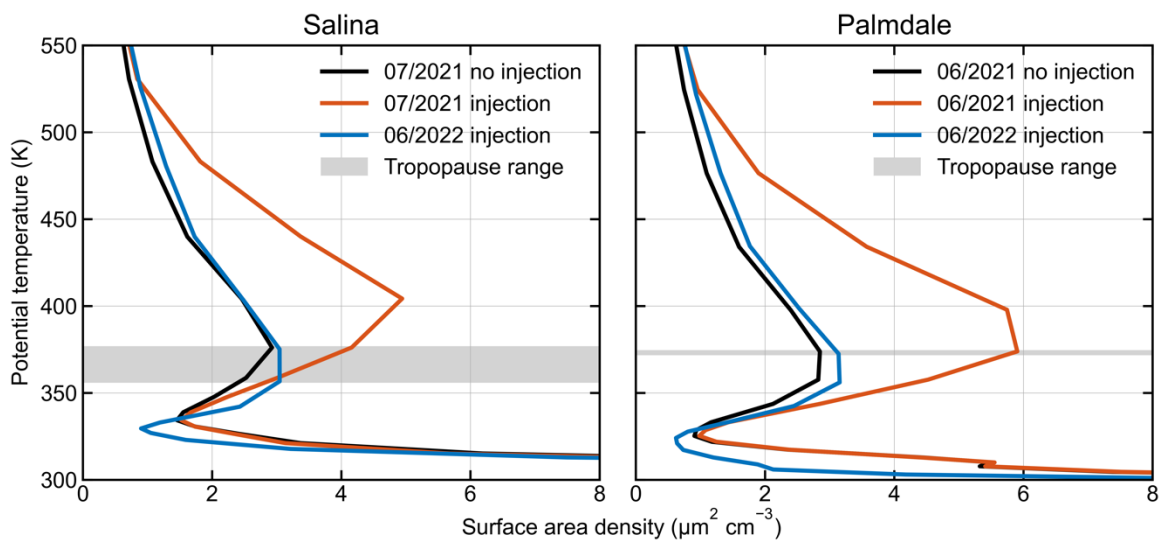

Figure S2. SOCOL-AERv2 surface area density vertical profiles. The black line is the no-injection simulation. The orange and blue lines are model runs with a 0.4 Tg SO<sub>2</sub> injection. The percent difference between the 2022 injection case (blue line) and the 2021 no-injection case (black line) averaged over the range of 375-530 K is 12% and 16% for Salina and Palmdale, respectively.

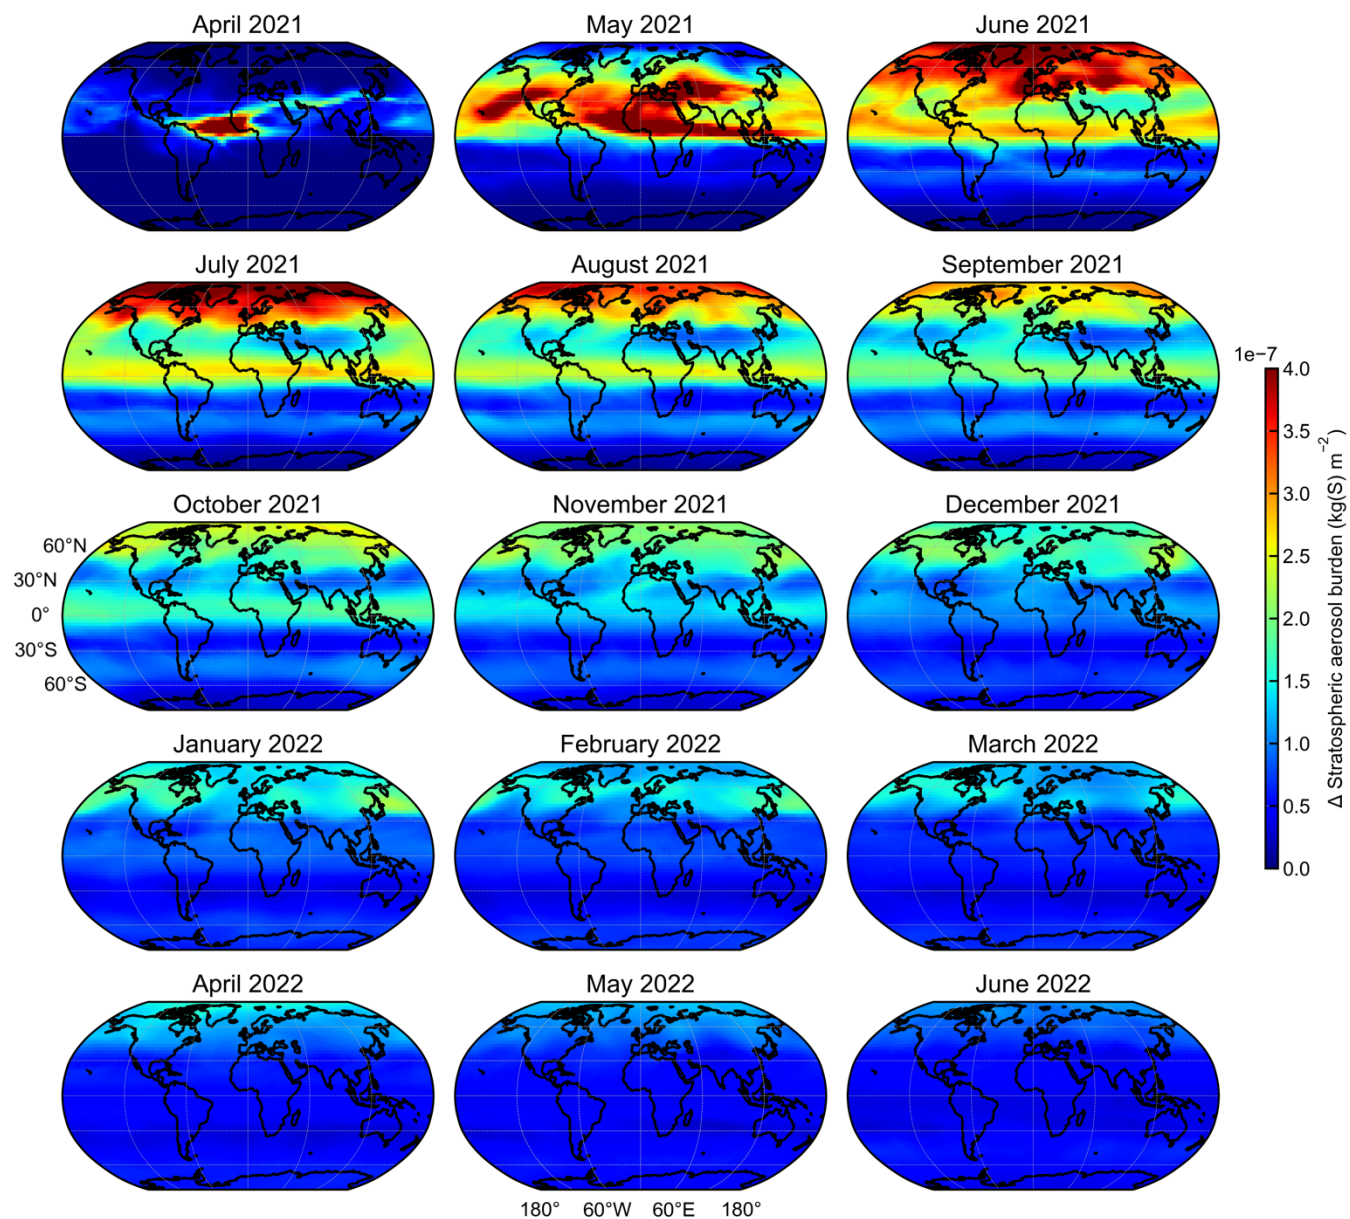

Figure S3. Global map of the stratospheric aerosol burden from the La Soufrière eruption. The aerosol burden is plotted as the difference between the 0.4 Tg injection and no-injection SOCOL-AERv2 simulations.

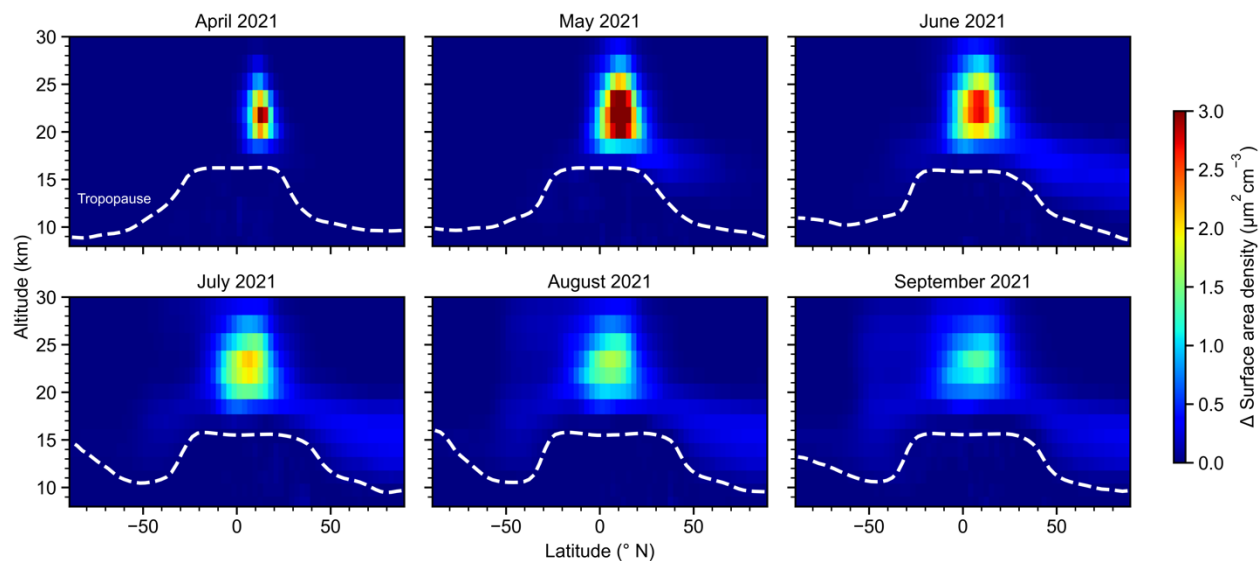

Figure S4. Analogous to Figure 4 in the main text but for the upper plume simulation. Latitude and altitude distributions of aerosol surface area density (SAD) difference between injection and non-injection simulations performed by SOCOL-AERv2 from April to September 2021. Delta SAD was averaged zonally and monthly and used all aerosol sizes in the calculation. The white dashed lines indicate the WMO-defined tropopause. The upper plume was simulated by injecting 0.1 Tg of SO<sub>2</sub> in one grid box at 42 hPa (~22 km).

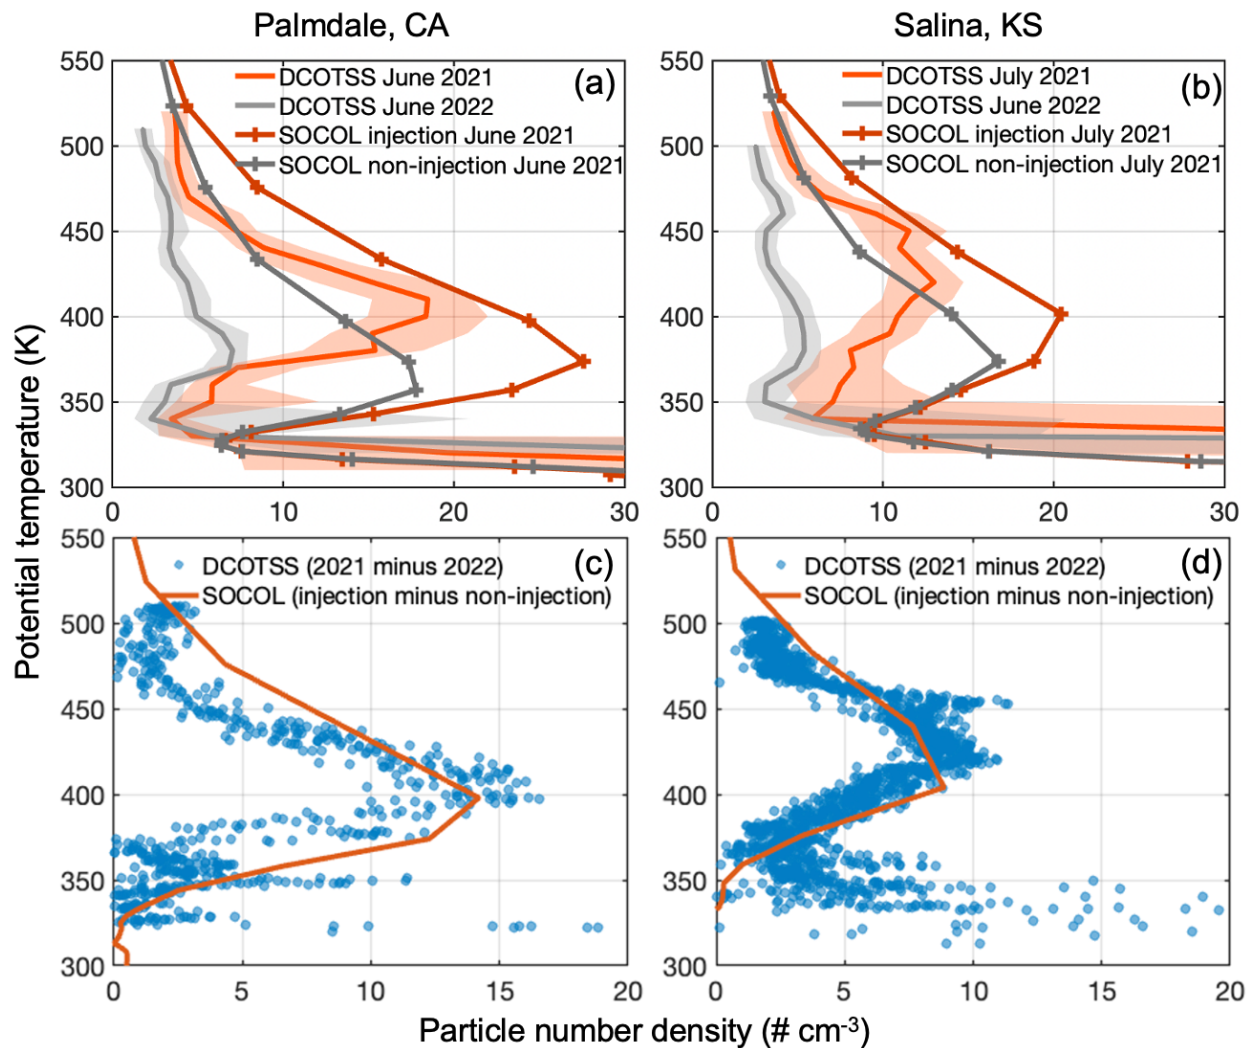

Figure S5. Comparisons of particle number density profiles between Socol-AERv2 model simulations and DCOTSS aircraft measurements. (a) and (c) present vertical profiles over Palmdale (averaged over 32-38° N, 115-121° W), while (b) and (d) present vertical profiles over Salina (averaged over 36-42° N, 95-101° W). The absolute number density profiles are presented in (a) and (b), while the number density enhancement profiles are presented in (c) and (d). Shaded areas in (a) and (b) correspond the 10th and 90th percentiles of the DCOTSS aircraft measurements.

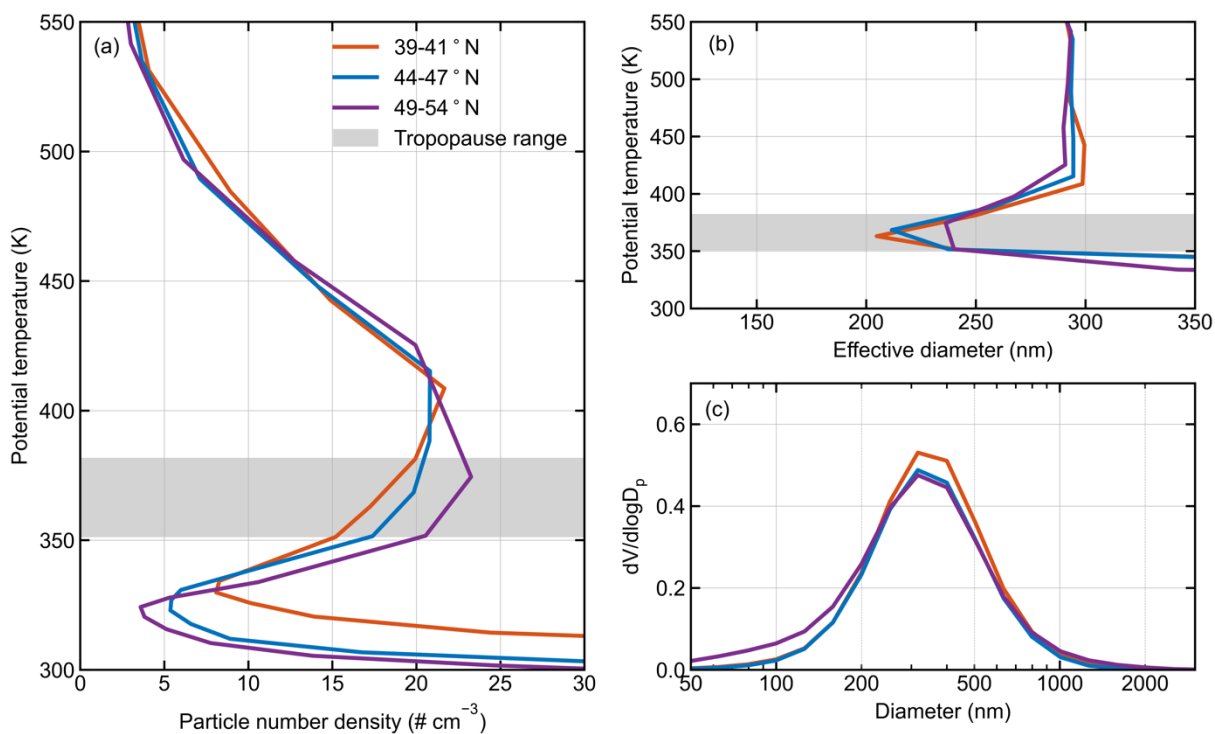

Figure S6. Model equivalent to Figure 6. Panel (c) is the size distribution at the plume peak. The peaks of 33-37° N, 44-47° N, and 49-54° N are at pressure levels 89 hPa, 89 hPa, and 143 hPa, respectively, which correspond to a potential temperature of 409, 415, and 374, respectively. The grey tropopause range in (a) and (b) is the modeled tropopause range.

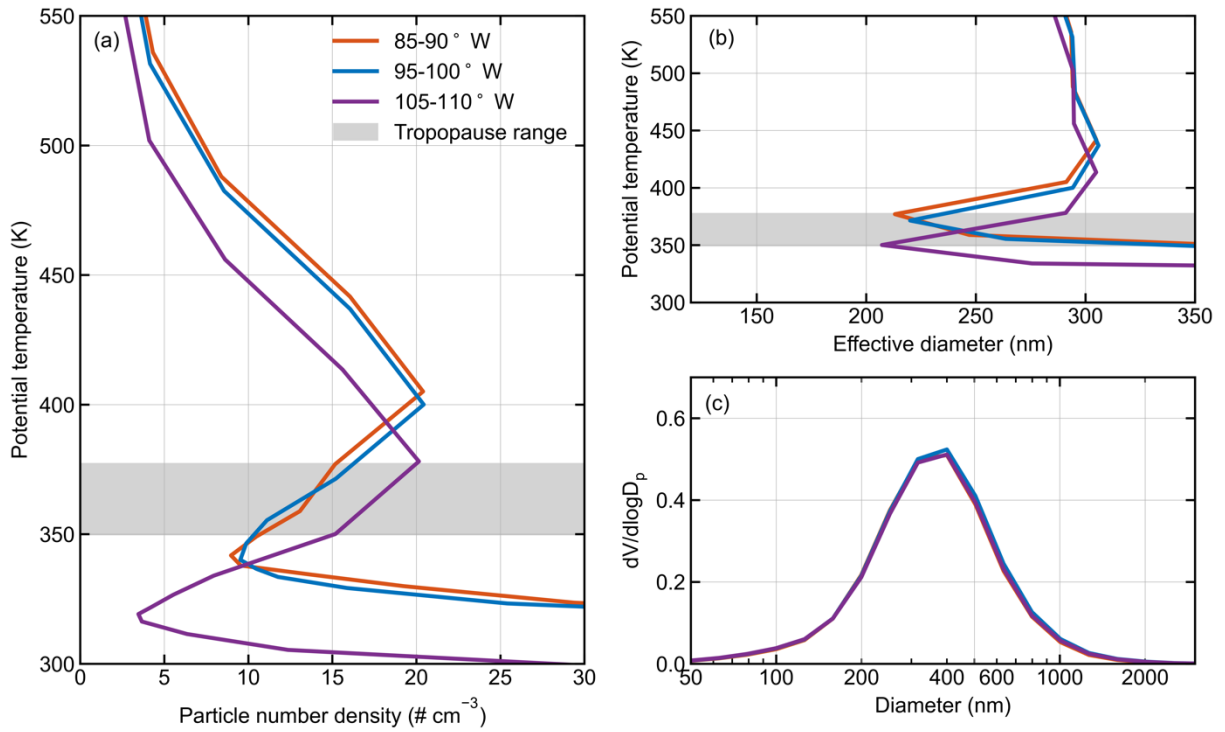

Figure S7. Model equivalent to Figure 7. Panel (c) is the size distribution at the plume peak. The peaks of 85-90° W, 95-100° W, and 105-110° W are all at pressure level 89 hPa which correspond to potential temperatures of 405, 400, and 378, respectively. The downward shift of the 105-110 W profile in panels (a) and (b) is an artifact from the calculation of potential temperature. This feature is not present with pressure as the vertical coordinate. The grey tropopause range in (a) and (b) is the modeled tropopause range.

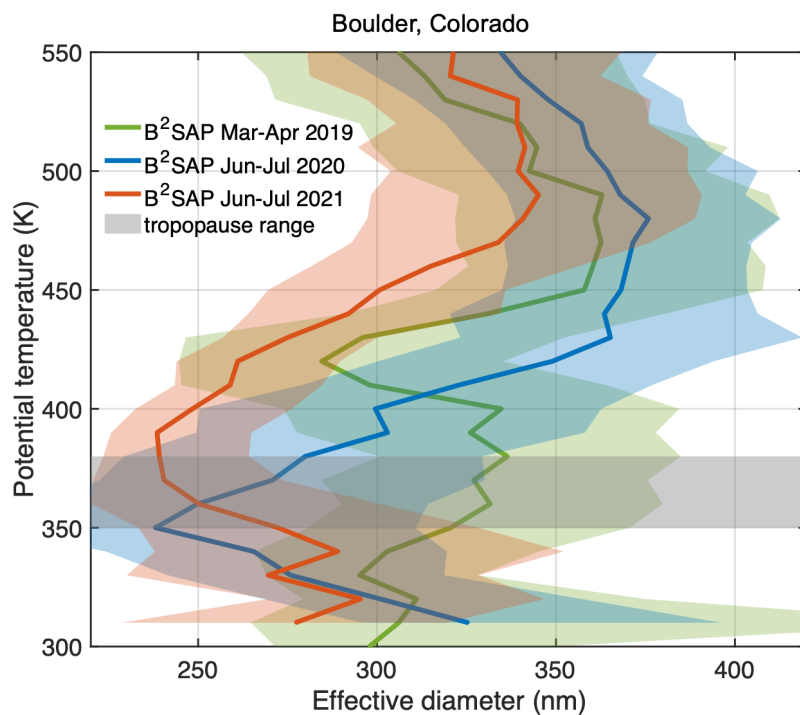

Figure S8. Vertical profiles of aerosol effective diameter over Boulder, Colorado, during March–April 2019, June–July 2020, and June–July 2021 from balloon-borne measurements as part of the Baseline Balloon Stratospheric Aerosol Profiles (B<sup>2</sup>SAP) project (Todt et al., 2023). Data from March–April 2019 was selected to represent unperturbed condition before the 2019 Raikoke eruption.

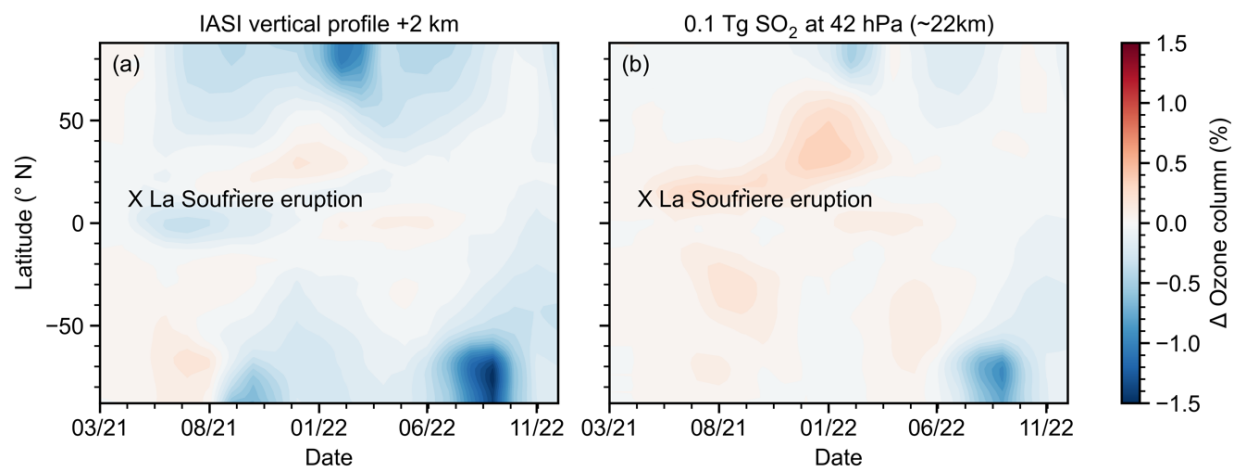

Figure S9. Modeled zonal-averaged ozone column change for two sensitivity simulations: (a) a 2 km upward shift of the IASI SO<sub>2</sub> vertical profile and (b) 0.1 Tg injected at 42 hPa (~22 km) in a single model grid cell above La Soufrière. Ozone column change is shown as the percent difference between the SO<sub>2</sub> injection simulation and the no-injection simulation.

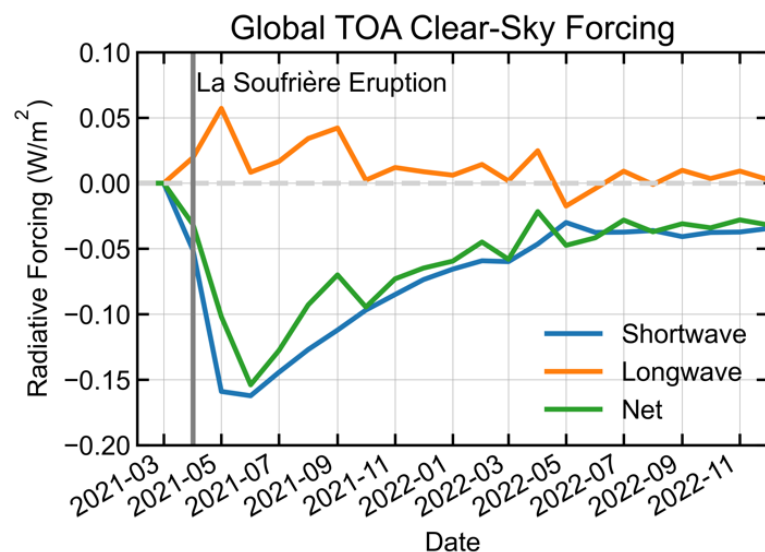

Figure S10. Global top-of-atmosphere (TOA) clear-sky radiative forcing following the La Soufrière eruption based on SOCOL-AERv2 simulations. Radiative forcing is calculated as the difference between the SO<sub>2</sub> injection simulation and the no-injection simulation.

## References

- Todt, M. A., Asher, E., Hall, E., Cullis, P., Jordan, A., Xiong, K., et al. (2023). Baseline Balloon Stratospheric Aerosol Profiles (B2SAP)—Systematic Measurements of Aerosol Number Density and Size. *Journal of Geophysical Research: Atmospheres*, 128(12), e2022JD038041.
